# Supplementary material
Source: ML conference proceedings conference paper supplement (https://openreview.net/forum?id=8i79fjmAXE)
Supplement: supplementary_material [file attachment]

# User study results: Sketch gallery

Cube baseline  
Armchair extended

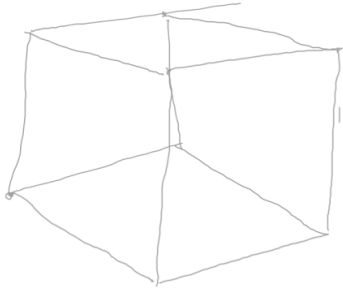

**P1**

VR

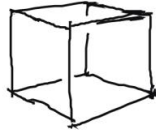

**P3**

VR

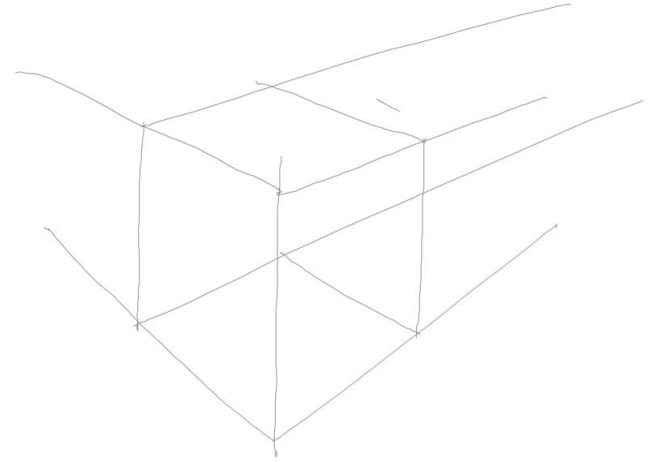

**P5**

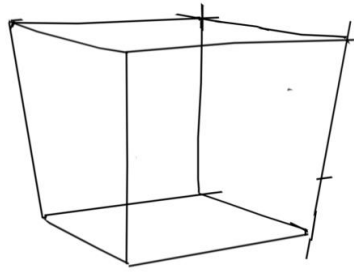

**P7**

VR

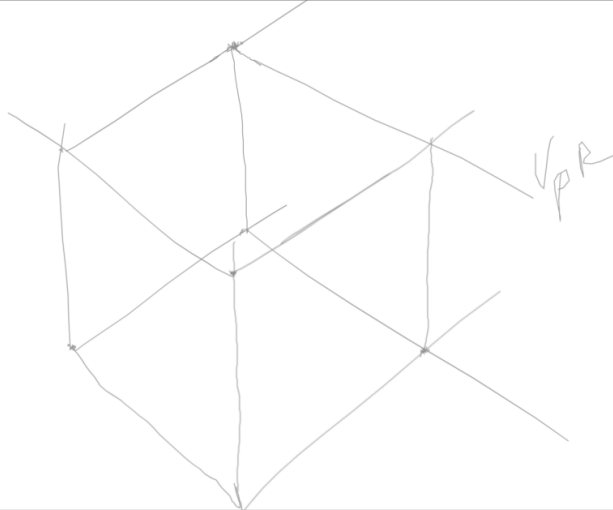

**P9**

VR

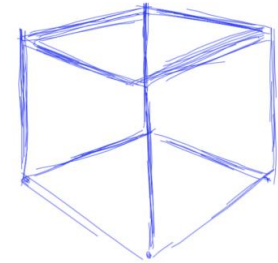

**P11**

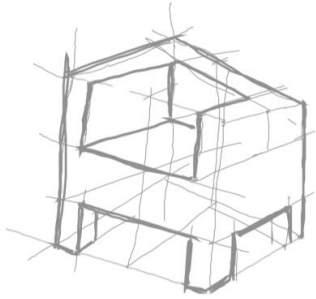

**P1**

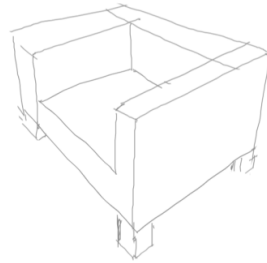

**P3**

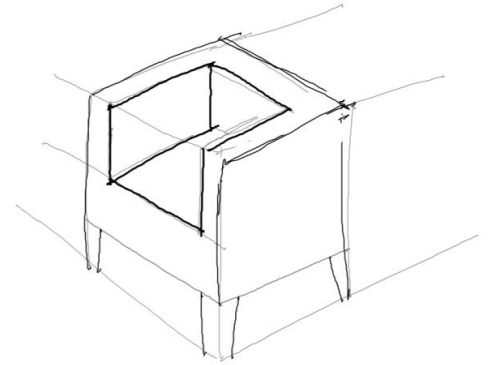

**P5**

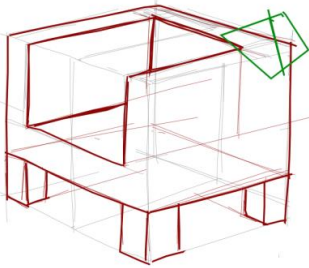

**P7**

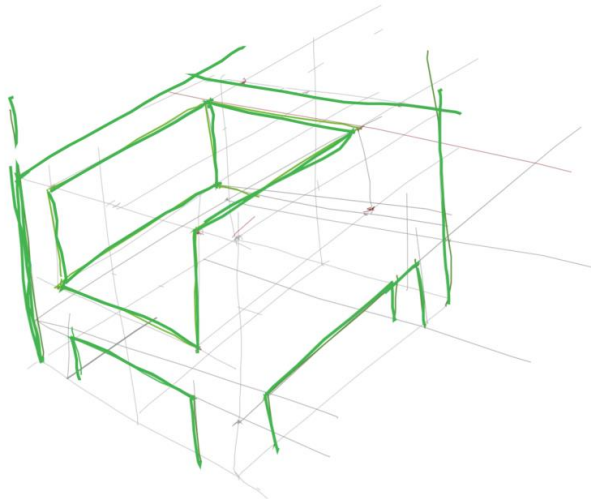

**P9**

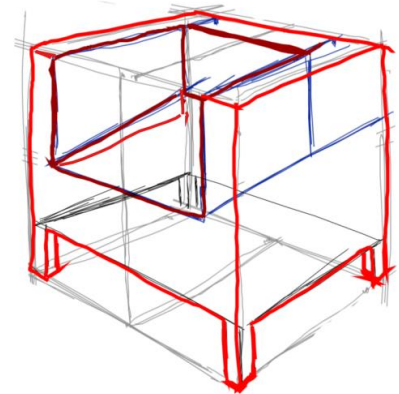

**P11**

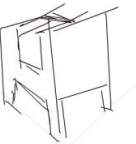

Cube extended  
Armchair baseline

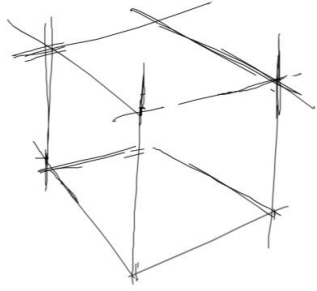

**P2**

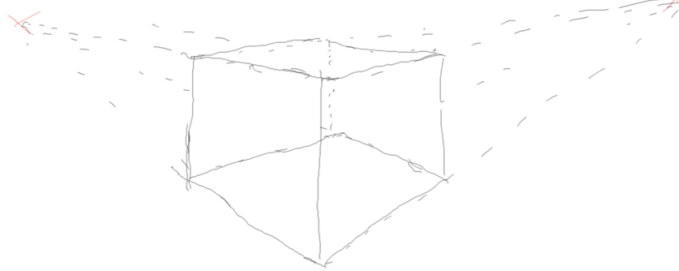

**P4**

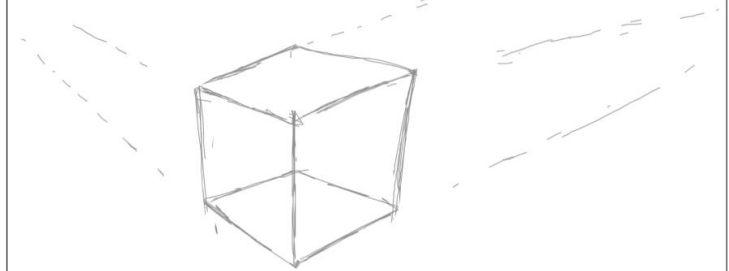

**P6**

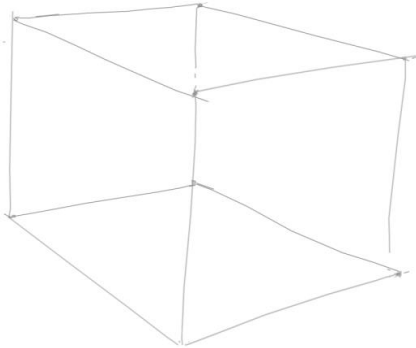

**P8**

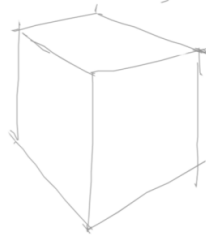

**P10**

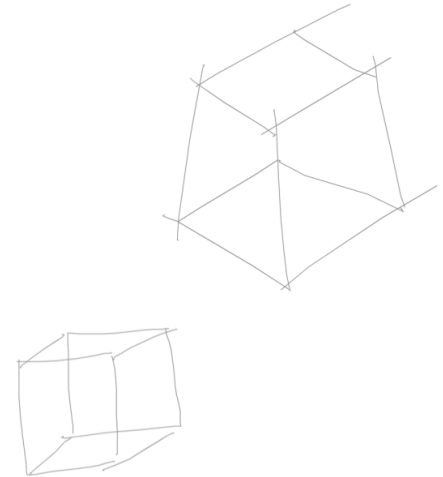

**P12**

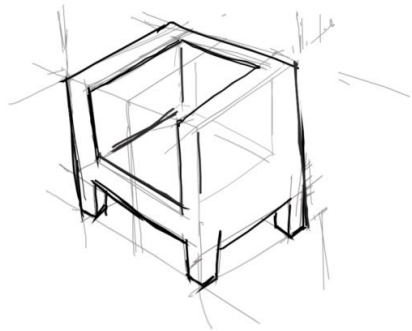

**P2**

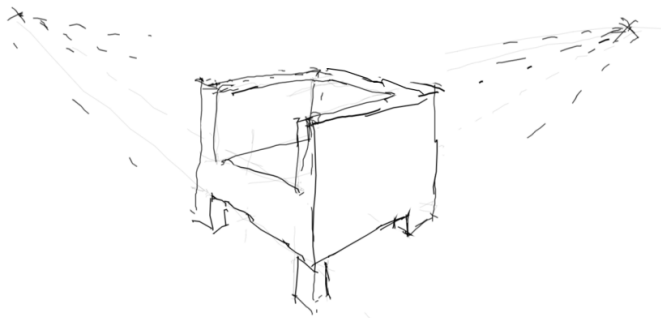

**P4**

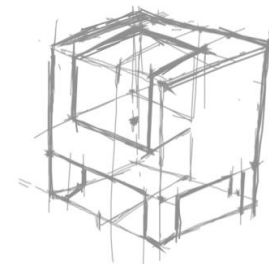

**P6**

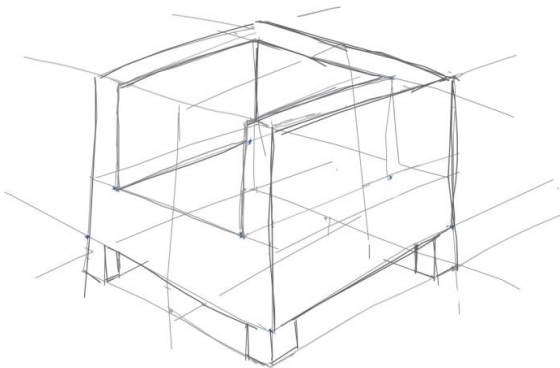

**P8**

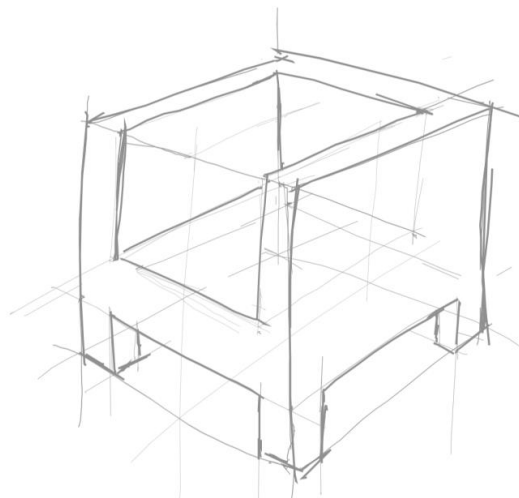

**P10**

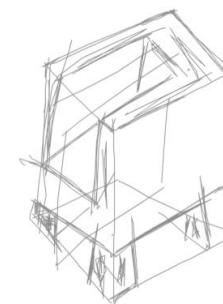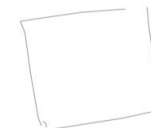

**P12**
