# Supplementary material
Source: ML conference proceedings conference paper supplement (https://openreview.net/forum?id=8i79fjmAXE)
Supplement: supplementary_material [file attachment]

## Sheet: background questionnaire
Questions	P1	P2	P3	P4	P5	P6	P7	P8	P9	P10	P11	P12
Age	18-25	26-35	46-55	18-25	26-35	18-25	18-25	18-25	18-25	26-35	18-25	26-35		Number-proposition correspondances
Gender	Woman	Woman	Man	Man	Woman	Woman	Woman	Woman	Woman	Man	Man	Woman		0	1	2	3
How would you describe your drawing skills?	2	2	1	2	2	2	2	2	1	1	2	1		I rarely or never draw. I am bad at drawing in general	I am a novice, but I draw sometimes.	I often practice drawing and have some training (e.g., I have followed online tutorials/I took a class or I have tried to improve my skills on my own).	I am very good at drawing/It is part of my job
How familiar are you with industrial design sketching?	0	0	1	0	1	1	1	0	0	1	1	1		I don't know anything about it.	I have some understanding of basic notions.	I have good knowledge.	I am a professional designer or had professional experience in the past.
...with theory of 3D perspective and perspective drawing?	1	1	3	1	2	0	2	2	1	2	2	0		I don't know anything about it.	I am only familiar with basic notions.	I can follow some perspective rules while drawing.	I have a good grasp: I can draw in perspective several objects.
Comments				Only paper-based drawings, no background with tablet sketching.
What is your experience with video tutorials (not necessarily on sketching)?	3	1	2	2	3	1	0	1	2	3	0	2		I have never actively watched any tutorial video before.	I have followed a small number of video tutorials in the past.	I have followed several video tutorials in the past.	I regularly follow video tutorials to deepen my knowledge or learn new skills.
If you have followed tutorials in the past, which topics are of interest to you?	Mostly crochet and origami	Crochet, drawing (sketch, character design), circuit design	electronics, cooking, bricolage	For miniature painting and modeling, extensive online resources typically in the form of Youtube videos.	Drawing, Programming	how to use the software blender, unity, illustrator, somtimes some drawing technique video		Programming languages, arts and crafts for school (paper mache style), cooking	programming, photo or video editing softwares, school topics	Computer science, Softwares, Games
Comments
Have you ever used a pen display before?	1	3	3	0	1	3	3	3	1	1	1	2		Never	Once or a few times only in the past	Several times in the past	I regularly use one
Comments		Windows Surface pro with pen, graphic tablet with screen			I have used a tablet but without included screen	i use proceate mainly to draw		use a tablet to take notes in class

## Sheet: post tuto questionnaires
		P1	P3	P5	P7	P9	P11
cube base	I discovered new drawing concepts and techniques	3	0	0	0	1	3			0	strongly disagree
	The video was comprehensible	4	1	0	3	4	3			1	somewhat disagree
	I could follow the instructions of the video well	4	3	2	3	4	4			2	neutral
	I applied the video instructions to my own drawings.	4	3	1	3	4	3			3	somewhat agree
armchair ext	I discovered new drawing concepts and techniques	4	1	2	3	4	1			4	strongly agree
	The video was comprehensible	3	4	3	3	3	2
	I could follow the instructions of the video well	3	4	2	4	3	4
	I applied the video instructions to my own drawings.	4	4	4	3	3	3
		P2	P4	P6	P8	P10	P12
cube ext	I discovered new drawing concepts and techniques	1	1	2	1	3	3
	The video was comprehensible	4	3	4	4	4	4
	I could follow the instructions of the video well	3	2	3	4	4	2
	I applied the video instructions to my own drawings.	4	3	4	4	4	1
armchair base	I discovered new drawing concepts and techniques	1	3	3	1	2	4
	The video was comprehensible	1	2	4	3	3	3
	I could follow the instructions of the video well	2	2	1	2	3	4
	I applied the video instructions to my own drawings.	4	3	4	4	4	3
					online questionnaire: no comment see the transcript

## Sheet: evaluation questionnaire
Propositions	Version	P1	P2	P3	P4	P5	P6	P7	P8	P9	P10	P11	P12
It allowed to effectively navigate the video.	Baseline	3	2	0	3	1	1	3	2	2	2	3	3		P6, P8, P9, P12: I added between "" corresponding parts of the transcript from the recording
	Extended	4	4	3	4	4	3	4	4	3	3	3	2
Comments		When you know exactly where you want to go in the video, it was more effective to use the extended version with the chapters and transcript that are more precise than the scroll bar.	Need to be used to the baseline and be able to remember unclear points		The extended version was used only for the cube, requiring fewer searches in order to effectively interpret the tutorial. Therefore the advanced functions of the extended version were not much used in the following of the cube tutorial, while they could have been useful in the armchair tutorial.		the step separation in the extended version helps me to trace back and reflect what i did wrong more easily	Both are ok but the extended version is better: highilights help distinguishing what is the current stroke	"The one thing I struggled with in the extended version was the hovering capabilities of the pen: when I was trying to find the thumbnail I wanted to click on, it kind of magnets towards the pen. And I found it kind of a bit frustrating because it was moving where I was looking at." "It's hard to think about [the base version] because it's what we are so familiar with in the design. (...) To me, …		I would have put strongly agree if I did not have the problem of the screen reacting to the pen before I clicked		"In the first [version] I tried, [having the extended version] was helpful really. But in the second time, it was good because I already like saw it…" "Like I get used to use the [setup]: (…) the first time, it wasn't easy to have the two screens [*windows] and focusing here and do the same stuff. Having information helps, but like in the second time, I already get used to having the two screens."
It helped me follow the teacher's instructions.	Baseline	4	3	1	4	0	2	2	1	2	2	2	4
	Extended	4	4	4	1	3	3	4	4	4	4	3	4
Comments		Having the video tutorial next to the canvas is helpfulm as you don't have to look away opr switch windows/tabs.			In the armchair tutorial, there was more back-and-forth in the video in order to reproduce accurately the armchair in my drawing.				"I didn't take advantage of moving the viewpoint because I was trying to replicate the viewpoint exactly, so moving the viewpoint would have changed the image. But having those there really helped me visually. And then being able to click on the transcript to go to a certain point was really nice, and the fact that the words were underlined was very nice." "[The base version] didn't do anything t…
It helped me understand the concepts in the video.	Baseline	2	2	2	1	1	4	1	0	2	3	1	3
	Extended	3	3	3	2	2	4	3	3	4	3	3	4
Comments		The highlighted lines helped for the understanding of the concept.		The difference comes mostly from drawing objects of different complexity rather than the tool itself	In the cube tutorial (*introductory example?), the transcript was useful to grasp the section planes represented in the cube.			The dotted blue lines really are a plus if we want to understand the concepts. I guess that because I already knew the concept of vanishing point? But I would have rather learned or I would advise someone who wants to learn to use the second interface (*extended)	"It's also hard to say because I did the extended version first. So seeing the viewpoints was a good refresher(...). But I probably would have gotten that just from the video on its own." "Seeing more detail on the video, I could get the information in multiple different ways so although the concepts aren't new, what I am seeing, I'm just intaking quicker, whereas just trying to listen. Because w…
Feature	Utility to…	P1	P2	P3	P4	P5	P6	P7	P8	P9	P10	P11	P12
Colored annotations on the video (lines, planes, converging lines)	Clarify the video material	3	3	3	2	2	3	3	2	3	3	2	3
	Assist video navigation	1	1	3	0	1	3	3	0	3	3	1	3
	Assist drawing	3	0	0	1	2	3	3	3	3	3	3	3
Comments				Assisting drawing: would be more useful on the drawing than on the video itself	To draw, it was most useful to understand the spatial structure of the lines, rather than using the colored lines of the drawing as they were shown.				"It was useful with the material, especially when he was drawing and the red lines would come up to kind of show what was the last thing that he had just done. Because I do look at the other screen [*window] and back at the video, it brought me in to where we currently were."		Very useful!		"When you draw, you have many lines, which could be confusing."
Interactive video elements (circular widget, previews)	Clarify the video material	0	2	1	2	3	1	2	0	3	2	1	3
	Assist video navigation	0	0	0	2	0	3	0	1	0	0	0	3
	Assist drawing	0	1	0	0	1	3	3	0	3	2	2	3
Comments		Not used, I forgot about them.		Same	For the cube tutorial, the vanishing points were outside the window to reproduce the method used I had to represent them on the picture, therefore no one-to-one correspondance with the drawing of the video.		"I think I didn't use that. (…) I think it's useful but I think it's hard to memorize all the feature." "That could be useful actually, like when you did something wrong, and when you try different perspectives, that could be useful I think." "When I did the first drawing, I think sometimes when I tried to look it would have been helpful like using the navigating preview thing."		"I didn't use these tools as much as I should have… Cause you're so used to do things a certain way, you just forget that those are options." "I didn't really interact with video at all…" "I think I used it to click once though in the video. (…) I wanted to to use it [but couldn't manage as I wasn't clicked on the video]." "It might have been for the lengths of the lines. (...)Like which lines we…	"I didn't use them because I think there were a lot of actions between moving from the video, to the drawing and then I just wanted to change colors and like I was doing a lot of stuff at the moment. Having them pop up, without me taking an action towards them, it was nice because it helped me."	Unfortunately I forgot to use the assisting video navigation	I didn't use it. I kind of forgot the panning was possible. Would have been useful for the vanishing points. To see how far away they were from the drawing. To get a reference.	*As the investigator showed the features again:* "Oh my god, [I forgot about that]. " "At some point, I was like deleting the stuff just to align [my perspective with the one in the video]." "I already forgot about them and I was trying to do the same thing [that would be done using this tool.] Like every time I would delete, just to make them align, it would have made it easier."
Colored cues velow the playbar	Clarify the video material	1	0	2	0	0	2	0	0	0	1	0	0
	Assist video navigation	1	3	3	1	1	0	0	0	1	3	2	0
	Assist drawing	0	1	0	0	0	0	0	0	0	2	2	0
Comments					Only useful to find quickly some intermediate steps.		"Sometimes it's really hard to (...) know what they represent [if you don't know the color code well]."		"I think for a longer video, where I might like dragging along, they would be useful. But because the video is only 3 minutes, I didn't have to jump between points as much. I know in other similar kind of viewers, I do use it. Like if I'm watching like an hour-long podcast, they'll sometimes show points of like highlights, I would definitely click on it."	"I didn't really use them, maybe slightly, because I didn't really know which word do they correlate with"
Chapter thumbnails	Clarify the video material	1	2	3	0	3	3	3	0	0	2	2	2
	Assist video navigation	3	3	3	2	3	3	3	2	3	3	1	2
	Assist drawing	0	1	2	0	1	3	2	2	3	1	0	2
Comments					Were useful to find points of interest in the structure of the cube tutorial.			The only bad thing for me is the automatic scrolling, without paying attention I lost the step I was looking at while hovering over the thumbnails.	"Glancing over [the thumbnails], I could see what was coming up next and it just helps me set myself up for success."		Very useful because the titles were part of the speech, it was much more easy to remember where we are	the thumbnail itself did not say that much.	"When I'm drawing, why would I need for them?" "When I watch video to do something, I see the whole video first. After I finish, I split it myself. Sometimes I take screenshot and organize them together to make my own guide to follow." [So I would find it more useful if I could customize it]
Video transcript	Clarify the video material	3	3	3	1	3	3	0	0	3	3	2	1
	Assist video navigation	3	1	3	0	1	0	0	1	1	3	0	1
	Assist drawing	0	2	0	2	1	1	0	0	2	3	1	1
Comments					When reproducing the drawing of the tutorial, the transcript allows us to pause the video and to have the reference picture on hand with its explainations.				"For example 'vertical line' or 'another vertical line', differentiating between those if you didn't have the whole transcript would be difficult, but having the context of the whole transcript made that easier."				"I would only focus on the lines" " unless the video is really short"
Colored links in the video transcript	Clarify the video material	0	3	2	1	2	3	3	0	2	3	1	3
	Assist video navigation	2	3	3	1	2	0	1	3	3	3	3	3
	Assist drawing	0	1	0	0	1	3	3	0	3	3	3	3
Comments				About the clarification: I used it more as highlighting keywords for fast reading than links.	Useful as they made the structure of the video and of the drawing more explicit. Also helpful to find points of reference.		"I click them to see how it goes" [You click more to see the elements, rather than for navigation] "Sometimes he mentions for example the vanishing points and also the plane, I think it's really nice to see where actually the point is." [You know that if you click on those linkes, you will see the highlight appear] "Especially if you're new to the system and you see this highlighted text, it kind…		"These are very useful for video navigation, partly because of that thing where I look away and come back and want to go back to what was just said, it was easy to just click the link. And also because it was easier to use the pen with than the other thing [*the thumbnails]"
Augmentation/Interaction ideas				Perspective lines on the canvas; Highlighting lines on the canvas? (harder: need to analyse the user's drawing! Especially mine :-)); A way to quickly scroll through the whole text maybe by scrolling chapter by chapter; A ruler	Even when the plan of the tutorial is not explicitely laid out in the video, it would be useful that there were a table of contents with chapter titles in the beginning of the transcript (maybe with hyperlinks in the table, to the different chapters).	For shape intersections, showing or removing lines to show where the intersection occurs	"[Having the highlights on your own canvas] would be super useful for novice users. (…) so they know which step they're doing." "For the color coding, I would personally use something different. (…) For me, the most important part isn't to distinguish between lines, planes and vanishing points. Maybe it would be more interesting to know which part is newly added: (...) the teacher is gonna draw t…	Arrows to navigate in the thumbnails, maybe different colours for different planes (foreground plane, background plane) but it wouldn't really work with the color code to distinguish planes and lines.	Zoom out of the video to get smaller view	"On the video (…), having too much would be too much like I also forgot to use the [search?] feature because I was doing so many things."	Reproduce the converging lines on the canvas; Adding Ctrl-Z possibility; Possibility to modify the size of the eraser	last thumbnail would help if it would be a summary or final overview of the drawing: This would help to grasp the concept/drawing better. Helping lines for vanishing points in the drawing would have helped me: Maybe not all of them but the ones from the cube. Could be implemented as a second layer.	"Ability for the user to make his own [chapter splitting]." "When I try to do something the system could do for me, give me a reminder [to use the exploration features]" Assistance on canvas
									"Another thing that made me iffy about the circle [widget] is that there were no presets to where I could drag it to, and I couldn't have it stick there, it would just bounce back." "So I kind of felt like it would be interesting if I wasn't drawing or if I was doing multiple views. But if I only need to draw it from one perspective, I have no reason to want to look at it from another perspective…
