# Supplementary material
Source: ML conference proceedings conference paper supplement (https://openreview.net/forum?id=8i79fjmAXE)
Supplement: supplementary_material [file attachment]

# Evaluation Questionnaire (Interactive Design Sketching Tutorial User Study)

The goal of following questions is to assess your experience with the tutorials that you tested and collect your feedback about their various features.  
There are 20 questions in this survey.

## Participant number

Please enter your participant number here \*

Please write your answer here:

## Feedback on Tutorial Configurations

During the session, you tested two tutorial user interfaces: (1) a **base version** with essential features only and (2) an **extended version** with additional features.

Please, indicate to what extent you agree or disagree with the following statements concerning these user interface versions.

It allowed to effectively navigate the video. \*

Please choose the appropriate response for each item:

|                     | strongly disagree     | somewhat disagree     | neutral               | somewhat agree        | strongly agree        |
|---------------------|-----------------------|-----------------------|-----------------------|-----------------------|-----------------------|
| 1- Base version     | <input type="radio"/> |
| 2- Extended version | <input type="radio"/> |

Additional comments (optional):

Please write your answer here:

It helped me follow the teacher's instructions. \*

Please choose the appropriate response for each item:

|                     | strongly disagree     | somewhat disagree     | neutral               | somewhat agree        | strongly agree        |
|---------------------|-----------------------|-----------------------|-----------------------|-----------------------|-----------------------|
| 1- Base version     | <input type="radio"/> |
| 2- Extended version | <input type="radio"/> |

Additional comments (optional):

Please write your answer here:

It helped be understand the concepts in the video. \*

Please choose the appropriate response for each item:

|                     | strongly disagree     | somewhat disagree     | neutral               | somewhat agree        | strongly agree        |
|---------------------|-----------------------|-----------------------|-----------------------|-----------------------|-----------------------|
| 1- Base version     | <input type="radio"/> |
| 2- Extended version | <input type="radio"/> |

Additional comments (optionnal):

Please write your answer here:

How useful did you find the following features of the extended version?

You can optionally use the space below each table to elaborate on your answer or report on on specific problems that you encountered using this feature.

Colored annotations on the video (lines, planes, convergence lines) \*

Please choose the appropriate response for each item:

|                               | not useful            | slightly useful       | useful                | very useful           |
|-------------------------------|-----------------------|-----------------------|-----------------------|-----------------------|
| Clarifying the video material | <input type="radio"/> | <input type="radio"/> | <input type="radio"/> | <input type="radio"/> |
| Assisting video navigation    | <input type="radio"/> | <input type="radio"/> | <input type="radio"/> | <input type="radio"/> |
| Assisting drawing             | <input type="radio"/> | <input type="radio"/> | <input type="radio"/> | <input type="radio"/> |

Additional comments (optional):

Please write your answer here:

Interactive video elements (circular widgets, previews) \*

Please choose the appropriate response for each item:

|                               | not useful            | slightly useful       | useful                | very useful           |
|-------------------------------|-----------------------|-----------------------|-----------------------|-----------------------|
| Clarifying the video material | <input type="radio"/> | <input type="radio"/> | <input type="radio"/> | <input type="radio"/> |
| Assisting video navigation    | <input type="radio"/> | <input type="radio"/> | <input type="radio"/> | <input type="radio"/> |
| Assisting drawing             | <input type="radio"/> | <input type="radio"/> | <input type="radio"/> | <input type="radio"/> |

Additional comments (optional):

Please write your answer here:

Colored cues below the playbar \*

Please choose the appropriate response for each item:

|                               | not useful            | slightly useful       | useful                | very useful           |
|-------------------------------|-----------------------|-----------------------|-----------------------|-----------------------|
| Clarifying the video material | <input type="radio"/> | <input type="radio"/> | <input type="radio"/> | <input type="radio"/> |
| Assisting video navigation    | <input type="radio"/> | <input type="radio"/> | <input type="radio"/> | <input type="radio"/> |
| Assisting drawing             | <input type="radio"/> | <input type="radio"/> | <input type="radio"/> | <input type="radio"/> |

Additional comments (optional):

Please write your answer here:

Chapter thumbnails \*

Please choose the appropriate response for each item:

|                               | not useful            | slightly useful       | useful                | very useful           |
|-------------------------------|-----------------------|-----------------------|-----------------------|-----------------------|
| Clarifying the video material | <input type="radio"/> | <input type="radio"/> | <input type="radio"/> | <input type="radio"/> |
| Assisting video navigation    | <input type="radio"/> | <input type="radio"/> | <input type="radio"/> | <input type="radio"/> |
| Assisting drawing             | <input type="radio"/> | <input type="radio"/> | <input type="radio"/> | <input type="radio"/> |

Additional comments (optional):

Please write your answer here:

### Video transcript \*

Please choose the appropriate response for each item:

|                               | not useful            | slightly useful       | useful                | very useful           |
|-------------------------------|-----------------------|-----------------------|-----------------------|-----------------------|
| Clarifying the video material | <input type="radio"/> | <input type="radio"/> | <input type="radio"/> | <input type="radio"/> |
| Assisting video navigation    | <input type="radio"/> | <input type="radio"/> | <input type="radio"/> | <input type="radio"/> |
| Assisting drawing             | <input type="radio"/> | <input type="radio"/> | <input type="radio"/> | <input type="radio"/> |

### Additional comments (optional):

Please write your answer here:

### Colored links in the video transcript \*

Please choose the appropriate response for each item:

|                               | not useful            | slightly useful       | useful                | very useful           |
|-------------------------------|-----------------------|-----------------------|-----------------------|-----------------------|
| Clarifying the video material | <input type="radio"/> | <input type="radio"/> | <input type="radio"/> | <input type="radio"/> |
| Assisting video navigation    | <input type="radio"/> | <input type="radio"/> | <input type="radio"/> | <input type="radio"/> |
| Assisting drawing             | <input type="radio"/> | <input type="radio"/> | <input type="radio"/> | <input type="radio"/> |

### Additional comments (optional):

Please write your answer here:

### Can you think of other augmentations or interactions that could be useful for video tutorials? (optional)

Please write your answer here:

Thank you for filling this questionnaire and participating to this study. You are now done!  
24.04.2023 – 16:39

Submit your survey.  
Thank you for completing this survey.
