# Supplementary material
Source: ML conference proceedings conference paper supplement (https://openreview.net/forum?id=8i79fjmAXE)
Supplement: supplementary_material [file attachment]

**Participant N°:**

**User Interface (circle):**                      1 (base version)                      2 (extended version)

## **Learning Experience**

Please indicate to what extent you agree or disagree with the following statements.

**1. Throughout this session, I discovered new drawing concepts and techniques.**

- ☐ strongly disagree
- ☐ somewhat disagree
- ☐ neutral
- ☐ somewhat agree
- ☐ strongly agree

**2. The video was comprehensible.**

- ☐ strongly disagree
- ☐ somewhat disagree
- ☐ neutral
- ☐ somewhat agree
- ☐ strongly agree

**3. I could follow the instructions of the video well.**

- ☐ strongly disagree
- ☐ somewhat disagree
- ☐ neutral
- ☐ somewhat agree
- ☐ strongly agree

**4. I applied the video instructions to my own drawings.**

- ☐ strongly disagree
- ☐ somewhat disagree
- ☐ neutral
- ☐ somewhat agree
- ☐ strongly agree

**5. (Answer orally) What strategy did you adopt with the given tool? Did you face any difficulties with the drawing or the system?**
