# Supplementary material
Source: ML conference proceedings conference paper supplement (https://openreview.net/forum?id=8i79fjmAXE)
Supplement: supplementary_material [file attachment]

# Background Questionnaire (Interactive Design Sketching Tutorial User Study)

The purpose of the following questions is to collect demographic information about your participation and help us assess your background. Do not spend more than 5 minutes answering them. There are 12 questions in this survey.

## Global Background

Please indicate your participant number: \*

Please write your answer here:

Age: \*

Please choose **only one** of the following:

- ☐ 18-25
- ☐ 26-35
- ☐ 36-45
- ☐ 46-55
- ☐ 56 or above

Gender: \*

Please choose **only one** of the following:

- ☐ Woman
- ☐ Man
- ☐ Non-binary
- ☐ Prefer not to say
- ☐ Prefer to self-describe:

Make a comment on your choice here:

## Sketching and Perspective Drawing Skills

How would you describe your drawing skills? \*

Please choose **only one** of the following:

- ☐ I rarely or never draw. I am bad at drawing in general.
- ☐ I am a novice, but I draw sometimes.
- ☐ I often practice drawing and have some training (e.g., I have followed online tutorials/I took a class or I have tried to improve my skills on my own).
- ☐ I am very good at drawing/It is part of my job

### How familiar are you with industrial design sketching? \*

Please choose **only one** of the following:

- ☐ I don't know anything about it.
- ☐ I have some understanding of basic notions.
- ☐ I have good knowledge.
- ☐ I am a professional designer or had professional experience in the past.

### How familiar are you with theory of 3D perspective and perspective drawing? \*

Please choose **only one** of the following:

- ☐ I don't know anything about it.
- ☐ I am only familiar with basic notions.
- ☐ I can follow some perspective rules while drawing.
- ☐ I have a good grasp: I can draw in perspective several objects.

### Additional comments:

Please write your answer here:

## Experience with Video Tutorials

### What is your experience with video tutorials (not necessarily on sketching)? \*

Please choose **only one** of the following:

- ☐ I have never actively watched any video tutorial before.
- ☐ I have followed a small number of video tutorials in the past.
- ☐ I have followed several video tutorials in the past.
- ☐ I regularly follow video tutorials to deepen my knowledge or learn new skills.

### If you have followed tutorials in the past, which topics are of interest to you?

Please write your answer here:

### Additional comments:

Please write your answer here:

## Familiarity with Pen Displays

Have you ever used a pen display (an iPad with a pen, a Wacom Cintiq, etc.) before? \*

Please choose **only one** of the following:

- ☐ Never
- ☐ Once or a few times only in the past
- ☐ Several times in the past
- ☐ I regularly use one

Additional comments (optional):

Please write your answer here:

Thank you for answering this background questionnaire! You can now move on to trying out the tutorial systems.  
17.04.2023 – 12:32

Submit your survey.  
Thank you for completing this survey.
